# Supplementary material for: Asymmetric Bertrand-Edgeworth-Chamberlin Competition with Linear Demand: A Pediatric Vaccine Pricing Model
Source: Atypon-hosted journal article supplement (doi:10.1287/serv.2016.0129), 2016-03-01
Supplement: serv.2016.0129-sm-technical_app.pdf [file serv.2016.0129-sm-technical_app.pdf]

# Technical Appendix to: Asymmetric Bertrand-Edgeworth-Chamberlin Competition with Linear Demand: A Pediatric Vaccine Pricing Model

Banafsheh Behzad

Sheldon H. Jacobson

Department of Information Systems

Department of Computer Science

California State University, Long Beach

University of Illinois at Urbana-Champaign

December 3, 2015

*Proof of Theorem 1.* If (a) holds, then no capacity constraint exists and the equilibrium price is the Bertrand-Chamberlin equilibrium  $p^B = \frac{a}{2b - c(n - 1)}$ . If (b) holds, then  $P_i(k_i, \sum_{j=1, j \neq i}^n k_j)$  is an equilibrium for manufacturer  $i$ ; since if  $i$  charges less than that price it still sells  $k_i$  but at a lower price, and hence, earns less. If manufacturer  $i$  charges a higher price, it has some residual demand but the optimal response is to charge  $r_i(\sum_{j=1, j \neq i}^n k_j)$  since  $k_i$  is less than or equal to optimal response function  $r_i(\sum_{j=1, j \neq i}^n k_j)$  in Cournot competition and  $r_i(\sum_{j=1, j \neq i}^n k_j)$  is decreasing, and hence, the firm is constrained by  $k_i$ . □

*Proof of Theorem 2. (a) and (b)* Define  $F$  as the set of manufacturers  $i \leq n$  such that

$\bar{p}_i = \bar{p}$ . Arguing along the lines of [2], note that when any manufacturer  $j \in F$  charges  $\bar{p}$ , its sales fall to less than its capacity  $k_j$ . If the latter does not hold, then  $\alpha - \bar{p} \geq \sum_{i=1}^n k_i > \gamma \sum_{i=1}^n k_i$ , which denotes that for any manufacturer  $i$ , such that  $Pr(p_i < \bar{p}) > 0$ , manufacturer  $i$  has not made the optimal response as it sold less than its capacity when charging  $\bar{p}$ . Furthermore, at most one manufacturer charges  $\bar{p}$  with positive probability. In fact, if  $Pr(p_j = \bar{p}) > 0$ , because of the jump in manufacturer  $i$ 's residual demand, when manufacturer  $j$  charges  $\bar{p}$ , charging slightly less than  $\bar{p}$  is better for any manufacturer  $i \neq j$ . Therefore, at least one manufacturer  $j \in F$  exists in the region of the mixed strategy equilibrium, where no manufacturer  $i \neq j$  charges  $\bar{p}$  with positive probability. Hence, there exists at least one manufacturer that charges a lower price than manufacturer  $j$  when it charges  $\bar{p}$ . In addition,  $\bar{p}$  must be an optimal response to manufacturer  $i \neq j$  equilibrium strategies. Therefore, it must be  $\bar{p} = \arg \max_p p \left( \alpha - p - \gamma \sum_{i=1, i \neq j}^n k_i \right) = P_j \left( r_j \left( \sum_{i=1, i \neq j}^n k_i \right), \sum_{i=1, i \neq j}^n k_i \right)$  and  $\pi_j^* = \bar{p} \left( \alpha - \bar{p} - \gamma \sum_{i=1, i \neq j}^n k_i \right) = R_j \left( \sum_{i=1, i \neq j}^n k_i \right)$ , for any  $j \in \{1, 2, \dots, n\}$  with the largest capacity.

Now it is required to show that when manufacturer  $j \in F$  and no manufacturer  $i \neq j$  charges  $\bar{p}$  with positive probability,  $k_j < k_1$  cannot hold. Note that at the equilibrium, manufacturer 1 will not charge a price of  $P_1 \left( r_1 \left( \sum_{i=2}^n k_i \right), \sum_{i=2}^n k_i \right)$ , and hence,  $R_1 \left( \sum_{i=2}^n k_i \right) = r_1 \left( \sum_{i=2}^n k_i \right) P_1 \left( r_1 \left( \sum_{i=2}^n k_i \right), \sum_{i=2}^n k_i \right) \leq \pi_1^*$ . Moreover, the assumption  $k_j < k_1$  results in  $k_1 R_j \left( \sum_{i=1, i \neq j}^n k_i \right) < k_j R_1 \left( \sum_{i=1, i \neq j}^n k_i \right)$  (the proof is given for homogeneous products in [2] and is similar to the case of the differentiated products). The following

equation is the immediate result of the two previous equations:

$$\pi_j^* = R_j \left( \sum_{i=1, i \neq j}^n k_i \right) < \frac{k_j}{k_1} R_1 \left( \sum_{i=2}^n k_i \right) \leq \frac{k_j}{k_1} \pi_1^* < \pi_1^*, \quad j = 1, 2, \dots, n. \quad (1)$$

Let  $q_{1(p_1=p_1)}$  denote manufacturer 1's expected sale when it charges  $\underline{p}_1$ . Manufacturer 1's expected profit at equilibrium can then be written as  $\pi_1^* = \underline{p}_1 q_{1(p_1=p_1)}$ . Define  $x \equiv \frac{q_{1(p_1=p_1)}}{k_1} \leq 1$ . Then  $\frac{k_j}{k_1} \pi_1^* = \underline{p}_1 k_j x$ . Equation (1) then leads to  $\pi_j^* < k_j \underline{p}_1 x$ . Note that if manufacturer  $j$  charges a price slightly less than  $\underline{p}_1$ , say  $\underline{p}_1^-$ , it sells its whole capacity  $k_j$ . Therefore,  $\pi_j(p_j = \underline{p}_1^-) = \underline{p}_1^- k_j \geq k_j \underline{p}_1 x > \pi_j^*$ , which is a contradiction. Therefore,  $\bar{p} = \arg \max_p p \left( \alpha - p - \gamma \sum_{i=2}^n k_i \right) = P_1 \left( r_1 \left( \sum_{i=2}^n k_i \right), \sum_{i=2}^n k_i \right)$  and  $\pi_j^* = R_j \left( \sum_{i=1, i \neq j}^n k_i \right) = \bar{p} \left( \alpha - \bar{p} - \gamma \sum_{i=2}^n k_i \right)$  for any  $j$  such that  $k_j = k_1$ . These hold true when  $k_1 > k_j$  for every  $j \neq 1$  as then it must be that  $1 \in F$  and no manufacturer  $j \neq 1$  charges  $\bar{p}$  with positive probability. The case remaining is when  $k_j = k_1$  for some  $j \neq 1$ . By setting  $k_j = k_1$  for any  $j \in F$  for which no  $i \neq j$  charges  $\bar{p}$  with positive probability, the aforementioned contradiction does not arise. Moreover,  $\pi_j^* = R_j \left( \sum_{i=1, i \neq j}^n k_i \right)$  for some  $j: k_j = k_1$ . In fact, if this does not hold, and hence,  $1 \in F$ , but  $\pi_j^* > \pi_1^* = R_1 \left( \sum_{i=2}^n k_i \right)$  for some  $j: k_j = k_1$ . Likewise, by charging  $\underline{p}_j^-$ , manufacturer 1 would sell  $k_1$ , and hence,  $\pi_1(p_1 = \underline{p}_j^-) = \underline{p}_j^- k_1 \geq \pi_j^* > \pi_1^*$ .

- (c) If  $\underline{p} < p < \max \{ \hat{p}, \hat{\hat{p}} \}$ , then  $\pi_1(p) \leq p \min \{ (\alpha - p), k_1 \} < \pi_1^* = \hat{p} k_1 = \hat{\hat{p}} (\alpha - \hat{\hat{p}})$ . Therefore,  $\underline{p} \geq \max \{ \hat{p}, \hat{\hat{p}} \}$ . Furthermore, if  $\underline{p} > \max \{ \hat{p}, \hat{\hat{p}} \}$ , then  $\pi_1(\underline{p}^-) > \pi_1^*$ . The reason is as follows: if  $\hat{p} > \hat{\hat{p}}$ , then  $\alpha - \hat{\hat{p}} > k_1$ , and since  $\underline{p} > \hat{p} > \hat{\hat{p}}$ , then  $\alpha - \underline{p} < \alpha - \hat{\hat{p}}$ . Then it is either  $\alpha - \underline{p} \geq k_1$ , which results in  $\pi_1(\underline{p}^-) = \underline{p} k_1 > \hat{p} k_1 = \pi_1^*$ , or  $\alpha - \underline{p} < k_1$ ,

which results in  $\pi_1(\underline{p}^-) = \underline{p}(\alpha - \underline{p}) > \hat{p}(\alpha - \hat{p}) = \pi_1^*$ . The last inequality is correct as  $p(\alpha - p)$  is increasing for  $p \in [0, \bar{p}]$ . If  $\hat{p} > \hat{p}$ , then  $k_1 > \alpha - \hat{p}$ , which results in  $\pi_1(\underline{p}^-) = \underline{p}(\alpha - \underline{p}) > \hat{p}(\alpha - \hat{p}) = \pi_1^*$ .

□

**Lemma 1.** *In a duopoly setting with linear demand, when no pure strategy equilibrium exists for manufacturer  $i$ ,  $\underline{p}_i \geq P_i(k_i, k_j)$  for  $i, j = 1, 2, i \neq j$ .*

*Proof.* If a price  $p$  less than  $P_i(k_i, k_j)$  is charged, then the maximum profit for manufacturer  $i$  is  $pk_i$ . If price  $P_i(k_i, k_j)$  is charged, then the minimum profit for manufacturer  $i$  is  $P_i(k_i, k_j)(k_i + k_j - k_j) = P_i(k_i, k_j)k_i$ , which is higher than the maximum profit gained if a price  $p$  (less than  $P_i(k_i, k_j)$ ) is charged. Therefore the minimum price charged by manufacturer  $i$  should be greater than or equal to  $P_i(k_i, k_j)$ .

□

**Lemma 2.** *In a duopoly setting with linear demand, when no pure strategy equilibrium exists for manufacturers 1 and 2, assume that either  $\bar{p}_1 > \bar{p}_2$ , or that  $\bar{p}_1 = \bar{p}_2$  and  $\bar{p}_2$  is not charged by manufacturer 2. Then:*

(a)  $\bar{p}_1 = P_1(r_1(k_2), k_2) = \bar{p}$ ;

(b)  $k_1 > r_1(k_2)$

(c)  $\underline{p}_1 = \underline{p}_2 = \underline{p}$ ;

(d) Neither  $\underline{p}_1$  and  $\underline{p}_2$  is charged by manufacturers 1 and 2, respectively.

*Proof.* **(a) and (b)** Assume that manufacturer 1 charges price  $p$  and manufacturer 2 charges

a price less than  $p$ . As in [3], define the revenue of manufacturer 1 as

$$\Xi(p) = p [\min(k_1, \max(0, \alpha - \gamma k_2 - p))]. \quad (2)$$

If manufacturer 1 charges  $\bar{p}_1$ , its profit is  $\Xi(\bar{p}_1)$  (given the assumption  $\bar{p}_1 > \bar{p}_2 > p_2$ ). If manufacturer 1 charges any price  $p > \bar{p}_1$ , its profit is  $\Xi(p)$ . If manufacturer 1 charges any price  $p < \bar{p}_1$ , its profit is at least  $\Xi(p)$ . Therefore, if an equilibrium exists,  $\bar{p}_1$  must be the maximization point of  $\Xi(p)$ .

By assumption,  $\gamma k_2 < a$ , and since  $a < \alpha = a(1 + \gamma)$ , then  $\gamma k_2 < \alpha$ . To maximize  $\Xi(p)$ ,  $\alpha - p < \gamma k_2$  cannot hold. To see this, assume that  $\alpha - p < \gamma k_2$ , then  $\Xi(p) = 0$  holds. Therefore,  $p \in [P_1(k_1, k_2), P_1(0, k_2)]$ . There exists a level of  $k$  for each  $p$  in this interval, indicated by  $k(p) = \alpha - p - \gamma k_2$ , such that  $\Xi(p) = k(p)P_1(k(p), k_2)$ . Clearly,  $k(p) \in [0, k_1]$ . By the strict concavity of  $k(p)P_1(k(p), k_2)$  and given that  $\arg \max_{k(p)} \{k(p)P_1(k(p), k_2)\}$  is equal to the Cournot optimal response function for manufacturer 2 ( $r_1(k_2)$ ),

$$\arg \max_{k(p) \in [0, k_1]} \{k(p)P_1(k(p), k_2)\} = \min(r_1(k_2), k_1). \quad (3)$$

If  $k_1 < r_1(k_2)$ , then  $\bar{p}_1 = P_1(k_1, k_2)$ , which is a contradiction (by Lemma 1). Therefore,  $k_1 > r_1(k_2)$ , and hence,  $\bar{p}_1 = P_1(r_1(k_2), k_2)$  and manufacturer 1 earns profit  $R_1(k_2) = r_1(k_2)P_1(r_1(k_2), k_2)$ . Furthermore, it is shown in Theorem 2 that  $\bar{p} = \arg \max_p p(\alpha - p - \gamma k_2) = \frac{\alpha - \gamma k_2}{2} = P_1(r_1(k_2), k_2) = \bar{p}_1$ , and (a) is proven.

- (c) Assume that  $\underline{p}_i < \underline{p}_j$ , for  $i, j = 1, 2$ . If manufacturer  $i$  charges  $\underline{p}_i$ , its profit is  $\underline{p}_i(\min(\alpha - \underline{p}_i), k_i)$ . If manufacturer  $i$  increases the price to any  $p \in (\underline{p}_i, \underline{p}_j)$ , its profit is  $p(\min(\alpha - p), k_i)$ . Since both  $k_1P_1(k_1, 0)$  and  $k_2P_2(0, k_2)$  are strictly concave, moving from  $\underline{p}_i$  towards the monopoly price will increase the profit, and hence, an equilibrium exists only if  $\alpha - \underline{p}_i < k_i$  and  $\underline{p}_i$  is the monopoly price. This means that  $\underline{p}_i = P_i(r_i(0), 0) = \frac{\alpha}{2}$ . However, it is known that,  $\underline{p}_i < \bar{p}_1 = P_1(r_1(k_2), k_2) = \frac{\alpha - \gamma k_2}{2} < P_1(r_1(0), 0)$ , which is

a contradiction. Therefore  $\underline{p}_1 = \underline{p}_2 = \underline{p}$  and its value is given by Theorem 2.

(d) As shown in Lemma 1,  $\underline{p} \geq P_1(k_1, k_2)$ . However,  $\underline{p} = P_1(k_1, k_2)$  does not hold since if manufacturer 1 selects a price sufficiently close to  $\underline{p}$ , its profit is at most  $k_1 P_1(k_1, k_2)$ . However, since  $k_1 > r_1(k_2)$  and the profit gained by manufacturer 1 at equilibrium is  $R_1(k_2)$ , this is not possible. Therefore,  $\underline{p} > P_1(k_1, k_2)$ . Now assume that, manufacturer 2 with lower capacity charges  $\underline{p}$ . Then manufacturer 1 could increase its profit by charging a price marginally less than  $\underline{p}$ . Therefore, it is irrational for manufacturer 2 to charge  $\underline{p}$ . Note that  $\underline{p}$  is the infimum of the support of the interval of prices charged by manufacturer 2, thus this manufacturer must charge prices greater than  $\underline{p}$ . However, if manufacturer 1 charges  $\underline{p}$ , manufacturer 2 profits more if it charges a price lower than  $\underline{p}$  than to charge a price higher than  $\underline{p}$ . Therefore, neither manufacturer 1, nor manufacturer 2, will charge  $\underline{p}$ .

□

**Lemma 3.** *In a duopoly setting with linear demand, when no pure strategy equilibrium exists for manufacturers 1 and 2,  $\bar{p}_1 = \bar{p}_2 = \bar{p} = P_1(r_1(k_2), k_2)$ .*

*Proof.* It is shown in Lemma 2 that  $\bar{p}_1 = P_1(r_1(k_2), k_2) = \bar{p}$ . Manufacturer 2 cannot earn a profit more than  $R_2(k_1)$ , and hence, it has no incentive to charge a price greater than  $\bar{p}_1$ . So  $\bar{p}_1 = \bar{p}_2 = \bar{p} = P_1(r_1(k_2), k_2)$ . □

*Proof of Theorem 3.* Assume that manufacturer 1 charges a price  $p \in [\underline{p}, \bar{p}]$  and manufacturer 2 either charges a price less than  $p$  or greater than  $p$ . The expected profit of manufacturer 1 is given by

$$E_1(p) = \phi_2(p)p [\max(\alpha - p - \gamma k_2, 0)] + (1 - \phi_2(p))p [\min((\alpha - p), k_1)],$$

where  $\phi_2(p)$  is the probability that manufacturer 2 charges a price less than  $p$ . As shown in the proof of Lemma 2,  $\alpha - p > \gamma k_2$  and hence

$$E_1(p) = \phi_2(p)p[\alpha - p - \gamma k_2] + (1 - \phi_2(p))p[\min((\alpha - p), k_1)]. \quad (4)$$

Note that  $E_1(p) = R_1(k_2) = \underline{p}[\min((\alpha - \underline{p}), k_1)]$ .

Now assume that manufacturer 2 charges a price  $p \in [\underline{p}, \bar{p}]$  and manufacturer 1 either charges a price less than  $p$  or charges greater than  $p$ . The expected revenue of manufacturer 2 is given by

$$E_2(p) = \phi_1(p)p[\max(\alpha - p - \gamma k_1, 0)] + (1 - \phi_1(p))p[\min((\alpha - p), k_2)], \quad (5)$$

where  $\phi_1(p)$  is the probability that manufacturer 1 charges a price less than  $p$ . Note that  $E_2(p) = R_2(k_1) = \underline{p}[\min((\alpha - \underline{p}), k_2)]$ . Equations (4) and (5) need to be solved for  $\phi_2(p)$  and  $\phi_1(p)$ .

In solving for  $\phi_2(p)$ , three possible cases exist:

- (1) If  $k_1 > \alpha - \underline{p}$ , then  $k_1 > \alpha - p$ . Therefore  $\phi_2(p) = \frac{p(\alpha - p) - \underline{p}(\alpha - \underline{p})}{p\gamma k_2}$ ,
- (2) If  $k_1 < \alpha - \underline{p}$ , and  $k_1 < \alpha - p$ , then  $\phi_2(p) = \frac{(\underline{p} - p)k_1}{p[\alpha - p - \gamma k_2 - k_1]}$ ,
- (3) If  $k_1 < \alpha - \underline{p}$ , and  $k_1 > \alpha - p$ , then  $\phi_2(p) = \frac{p(\alpha - p) - \underline{p}k_1}{p\gamma k_2}$ .

In solving for  $\phi_1(p)$ , six possible cases exist:

- (1) If  $k_2 > \alpha - \underline{p}$ , and  $\alpha - p > \gamma k_1$ , then  $k_2 > \alpha - p$ . Therefore,  $\phi_1(p) = \frac{p(\alpha - p) - \underline{p}(\alpha - \underline{p})}{p\gamma k_1}$ .
- (2) If  $k_2 > \alpha - \underline{p}$ , and  $\alpha - p < \gamma k_1$ , then  $k_2 > \alpha - p$ . Therefore,  $\phi_1(p) = \frac{p(\alpha - p) - \underline{p}(\alpha - \underline{p})}{p(\alpha - p)}$ .
- (3) If  $k_2 < \alpha - \underline{p}$ , and  $\alpha - p > \gamma k_1$ , and  $k_2 > \alpha - p$ . Therefore,  $\phi_1(p) = \frac{p(\alpha - p) - \underline{p}k_2}{p\gamma k_1}$ .

(4) If  $k_2 < \alpha - \underline{p}$ , and  $\alpha - p < \gamma k_1$ , and  $k_2 > \alpha - p$ . Therefore,  $\phi_1(p) = \frac{p(\alpha - p) - \underline{p}k_2}{p(\alpha - p)}$ .

(5) If  $k_2 < \alpha - \underline{p}$ , and  $\alpha - p > \gamma k_1$ , and  $k_2 < \alpha - p$ . Therefore,  $\phi_1(p) = \frac{(\underline{p} - p)k_2}{p[\alpha - p - \gamma k_1 - k_2]}$ .

(6) If  $k_2 < \alpha - \underline{p}$ , and  $\alpha - p < \gamma k_1$ , and  $k_2 < \alpha - p$ . Therefore,  $\phi_1(p) = \frac{(p - \underline{p})k_2}{pk_2}$ .

The only forms of  $\phi_1(p)$  and  $\phi_2(p)$ , which are consistent with [1] are case 2 for  $\phi_2(p)$  and case 5 for  $\phi_1(p)$ , respectively. Therefore,

$$\phi_1(p) = \frac{(\underline{p} - p)k_2}{p[\alpha - p - \gamma k_1 - k_2]} \quad (6)$$

$$\phi_2(p) = \frac{(p - \underline{p})k_1}{p[\alpha - p - \gamma k_2 - k_1]} \quad (7)$$

Note that if  $k_1 = k_2$ , then  $\phi_1(p)$  and  $\phi_2(p)$  are equal. □

## References

- [1] B. Behzad, M. J. Robbins, and S. H. Jacobson. A Symmetric Capacity-Constrained Differentiated Oligopoly Model for the United States Pediatric Vaccine Market with Linear Demand. *IIE Transactions*, 47(11):1252–1266, 2015.
- [2] M. A. DeFrancesco. On a Property of Mixed Strategy Equilibria of the Pricing Game. *Economics Bulletin*, 4(30):1–8, 2003.
- [3] D. Kreps and J. Scheinkman. Quantity Pre-Commitment and Bertrand Competition Yield Cournot Outcomes. *Bell Journal of Economics*, 14:326–37, 1983.
